# Supplementary material for: Preconditioning Strategies to Enhance Neural Stem Cell-Based Therapy for Ischemic Stroke
Source: PubMed Central journal article supplement (PMC7700351; doi:10.3390/brainsci10110893), 2020-11-23
Supplement: brainsci-10-00893-s001.pdf [file brainsci-10-00893-s001.pdf]

**Table S1.** Compilation of clinical trials of conventional NSC-based therapy for ischemic stroke (data searched up-to-date 31/3/2020).

| Title & Trial number                                                                                                            | Study phase & Cell Source | Eligibility Criteria                                                                                                                                                                                                                                                                                                                                                                                                                                                                                                                                                                                                                                                                                                                                                                 | Primary Outcome Measure                                            | Secondary Outcome Measure                                                                                                                                                                                                                                                                         | Evaluation Time Frame & Duration of Study         | Location       |
|---------------------------------------------------------------------------------------------------------------------------------|---------------------------|--------------------------------------------------------------------------------------------------------------------------------------------------------------------------------------------------------------------------------------------------------------------------------------------------------------------------------------------------------------------------------------------------------------------------------------------------------------------------------------------------------------------------------------------------------------------------------------------------------------------------------------------------------------------------------------------------------------------------------------------------------------------------------------|--------------------------------------------------------------------|---------------------------------------------------------------------------------------------------------------------------------------------------------------------------------------------------------------------------------------------------------------------------------------------------|---------------------------------------------------|----------------|
| Pilot Investigation of Stem Cells in Stroke (PISCES) (NCT01151124)                                                              | Phase I & NSC (CTX0E03)   | <ul style="list-style-type: none"> <li>• Males aged 60 years or over</li> <li>• Unilateral ischemic stroke</li> <li>• Modified National Institutes of Health Stroke Scale (NIHSS) score minimum 6</li> <li>• Neurologically stable for 2 m</li> <li>• mRS of 2-4</li> <li>• Fit for general anaesthesia, neurosurgery and have capacity to consent</li> <li>• Infarct at least 1cm diameter</li> </ul>                                                                                                                                                                                                                                                                                                                                                                               | <ul style="list-style-type: none"> <li>• Adverse events</li> </ul> | <ul style="list-style-type: none"> <li>• Barthel Index (BI)</li> <li>• Mini-Mental State Examination (MMSE)</li> <li>• Modified Rankin Score (mRS)</li> <li>• EuroQol-5 Dimension (EQ-5D)</li> </ul>                                                                                              | 1 year & 2010.6 to 2023.3 (Active/not recruiting) | United Kingdom |
| Phase I Clinical Study of Intracerebral Transplantation of Neural Stem Cells for the Treatment of Ischemic Stroke (NCT03296618) | Phase I & NSC (NSI-566)   | <ul style="list-style-type: none"> <li>• Have the ability to understand the requirements of the study, provide written informed consent and authorization for the use and disclosure of Protected Health Information (PHI)</li> <li>• Men and women 30-65 years old</li> <li>• Women must have a negative serum pregnancy test and practice an acceptable method of contraception or be of non-childbearing potential</li> <li>• At least 3 months but no more than 24 months from time of stroke, with a motor neurological deficit</li> <li>• Documented history of completed ischemic stroke in subcortical region of middle cerebral artery or lenticulostriate artery with or without cortical involvement</li> <li>• mRS of 2-4</li> <li>• FMMS score of 55 or less</li> </ul> | <ul style="list-style-type: none"> <li>• Adverse Events</li> </ul> | <ul style="list-style-type: none"> <li>• NIHSS</li> <li>• mRS</li> <li>• Fugl-Meyer Motor Score (FMSS)</li> <li>• MMSE</li> </ul> <p>Additional Outcome Measure:</p> <ul style="list-style-type: none"> <li>• *Magnetic Resonance Imaging (MRI) analysis</li> <li>• *Positron Emission</li> </ul> | 1 year & 2012.6 to 2018.5 (Active/not recruiting) | China          |

|                                                                                         |                          |                                                                                                                                                                                                                                                                                                                                                                                                                                                                                                                                                                                                                                                                                          |        |                                                                                                                                                                                                  |                                          |                |
|-----------------------------------------------------------------------------------------|--------------------------|------------------------------------------------------------------------------------------------------------------------------------------------------------------------------------------------------------------------------------------------------------------------------------------------------------------------------------------------------------------------------------------------------------------------------------------------------------------------------------------------------------------------------------------------------------------------------------------------------------------------------------------------------------------------------------------|--------|--------------------------------------------------------------------------------------------------------------------------------------------------------------------------------------------------|------------------------------------------|----------------|
|                                                                                         |                          | <ul style="list-style-type: none"> <li>• Two evaluations at approximately 3 weeks apart prior to surgery with less than +/- 4 point change in the NIHSS</li> <li>• Able and willing to meet all follow-up requirements and undergo post-physical therapy/rehabilitation</li> </ul>                                                                                                                                                                                                                                                                                                                                                                                                       |        | Tomography (PET) analysis                                                                                                                                                                        |                                          |                |
| Pilot Investigation of Stem Cells in Stroke Phase II Efficacy (PISCES II) (NCT02117635) | Phase II & NSC (CTX DP)  | <ul style="list-style-type: none"> <li>• Written informed consent or witnessed informed consent (if the patient is unable to sign informed consent due to paresis of the affected arm)</li> <li>• Supratentorial ischaemic stroke</li> <li>• Male or female aged 40 years or more.</li> <li>• Modified NIHSS of 2-4</li> <li>• Clinical diagnosis of stroke confirmed by physician using neuro-imaging</li> <li>• A Score of 0 or 1 for test 2 of the ARAT on day 28+7 and day 56+7 post-stroke using the affected arm.</li> <li>• Ability to comprehend verbal commands.</li> <li>• Eligible for neurosurgery including appropriate anatomical target for cell implantation.</li> </ul> | • ARAT | <ul style="list-style-type: none"> <li>• Action Research Arm Test (ARAT)</li> <li>• NIHSS</li> <li>• Rankin Focused Assessment (RFA) version of the MRS</li> <li>• BI</li> <li>• FMMS</li> </ul> | 1 year & 2014.4 to 2018.7 (Completed)    | United Kingdom |
| Investigation of Neural Stem Cells in Ischemic Stroke (PISCES III) (NCT03629275)        | Phase II & NSC (CTX0E03) | <ul style="list-style-type: none"> <li>• Ischemic stroke that includes the supratentorial region, occurring within 6 to 24 months of the time that surgical intervention will be performed (Qualifying Stroke Event)</li> <li>• mRS of 3 or 4</li> <li>• Some residual upper limb movement</li> <li>• Sufficient cognitive and language abilities to comprehend verbal commands and to carry out the study assessments</li> <li>• No medical conditions that would preclude neurosurgery</li> </ul>                                                                                                                                                                                      | • mRS  | <ul style="list-style-type: none"> <li>• BI</li> <li>• Timed Up and Go Test (TUG)</li> <li>• Chedoke Arm and Hand Activity Inventory (CAHAI)</li> <li>• Symbol Digit Modalities Test</li> </ul>  | 6 month & 2018.8 to 2022.11 (Recruiting) | United State   |

|                                                                                                                                                                               |                                           |                                                                                                                                                                                                                                                                                                                                                                                                                                                                                                                                                                                                                                                                                                                                                                                                                                                |                                                                                                                                                                                                                                                     |                                                                                                                                                                                                                                                                                                             |                                    |
|-------------------------------------------------------------------------------------------------------------------------------------------------------------------------------|-------------------------------------------|------------------------------------------------------------------------------------------------------------------------------------------------------------------------------------------------------------------------------------------------------------------------------------------------------------------------------------------------------------------------------------------------------------------------------------------------------------------------------------------------------------------------------------------------------------------------------------------------------------------------------------------------------------------------------------------------------------------------------------------------------------------------------------------------------------------------------------------------|-----------------------------------------------------------------------------------------------------------------------------------------------------------------------------------------------------------------------------------------------------|-------------------------------------------------------------------------------------------------------------------------------------------------------------------------------------------------------------------------------------------------------------------------------------------------------------|------------------------------------|
|                                                                                                                                                                               |                                           | <ul style="list-style-type: none"> <li>• Ability to attend study visits and complete all study assessments</li> </ul>                                                                                                                                                                                                                                                                                                                                                                                                                                                                                                                                                                                                                                                                                                                          |                                                                                                                                                                                                                                                     | <ul style="list-style-type: none"> <li>• Controlled Oral Word Association tasks</li> <li>• Multilingual Naming Test</li> <li>• Montreal Cognitive Assessment</li> <li>• NIHSS</li> <li>• FMMS</li> <li>• Stroke Impact Scale (SIS)</li> <li>• EQ-5D</li> </ul>                                              |                                    |
| <p>A Phase II/III Adaptive Crossover Study of Intracerebral Transplantation of Neural Stem Cells for the Treatment of Paralysis Due to Ischemic Stroke (ChiCTR1800014354)</p> | <p>Phase II/III &amp; hNSC NSI-566RSC</p> | <ul style="list-style-type: none"> <li>• Have the ability to understand the requirements of the study, provide written informed consent and authorization for the use and disclosure of Protected Health Information (PHI)</li> <li>• Men and women 30-65 years old</li> <li>• Women must have a negative serum pregnancy test and practice an acceptable method of contraception or be of non-childbearing potential</li> <li>• At least 4 months but no more than 24 months from time of stroke at the time of screening, with a motor neurological deficit</li> <li>• Documented history of completed ischemic stroke in subcortical region of middle cerebral artery or lenticulostriate artery with or without cortical involvement, with correlated findings by MRI</li> <li>• mRS of 2-4</li> <li>• FMMS score of 55 or less</li> </ul> | <ul style="list-style-type: none"> <li>• Vital signs</li> <li>• treatment-emergent adverse events</li> <li>• Clinical laboratory tests</li> <li>• Physical examination</li> <li>• Whole central nervous system (CNS) MRI</li> <li>• FMMS</li> </ul> | <ul style="list-style-type: none"> <li>• NIHSS</li> <li>• mRS</li> </ul> <p>Additional Outcome Measure:</p> <ul style="list-style-type: none"> <li>• *Fluorodeoxy-glucose-positron emission tomography (FDG-PET)</li> <li>• *Diffusion Tensor Imaging (DTI) of Brain</li> <li>• * functional MRI</li> </ul> | <p>2018.8 to 2021.6      China</p> |

|                                                                                                                                              |      |                                                                                                                                                                                                                                                                                                                                                                                                                                                                                                                                                                                                |                                                                                                  |                                                                                                            |                  |       |
|----------------------------------------------------------------------------------------------------------------------------------------------|------|------------------------------------------------------------------------------------------------------------------------------------------------------------------------------------------------------------------------------------------------------------------------------------------------------------------------------------------------------------------------------------------------------------------------------------------------------------------------------------------------------------------------------------------------------------------------------------------------|--------------------------------------------------------------------------------------------------|------------------------------------------------------------------------------------------------------------|------------------|-------|
|                                                                                                                                              |      | <ul style="list-style-type: none"> <li>• Two evaluations at approximately 3 weeks apart prior to surgery with no more than +/- 4 point change in the NIHSS</li> <li>• Able and willing to meet all follow-up requirements and willing to undergo post-physical therapy/rehabilitation.</li> </ul>                                                                                                                                                                                                                                                                                              |                                                                                                  |                                                                                                            |                  |       |
| <p>A single center randomized controlled trial for human-derived neural stem cell in the treatment of ischemic stroke (ChiCTR1900022741)</p> | hNSC | <ul style="list-style-type: none"> <li>• Aged 18-80 years old</li> <li>• Patients with ischemic stroke 2 to 24 months before screening, and the stroke was caused by unilateral anterior and/or middle cerebral artery</li> <li>• Patients with hemiplegia, NIHSS scores were higher than 6 and at least one limb movement disorder)</li> <li>• Neurologically were stable (variety of NIHSS was smaller than 2)</li> <li>• mRS of 2-4</li> <li>• Minimum infarct diameter of 1 cm on MRI</li> <li>• Informed consent signed by patient or family member and can complete follow-up</li> </ul> | <ul style="list-style-type: none"> <li>• Incidence of adverse events</li> <li>• NIHSS</li> </ul> | <ul style="list-style-type: none"> <li>• mRS</li> <li>• BI</li> <li>• MMSE</li> <li>• Brain MRI</li> </ul> | 2019.7 to 2021.6 | China |
